# Supplementary material for: miR−21 and NT-proBNP Correlate with Echocardiographic Parameters of Atrial Dysfunction and Predict Atrial Fibrillation
Source: PubMed Central journal article supplement (PMC7230176; doi:10.3390/jcm9041118), 2020-04-14
Supplement: jcm-09-01118-s001.pdf [file jcm-09-01118-s001.pdf]

Table S1. Regression analysis of training and test set.

| Parameter        | Training Set ( $\Sigma n = 35$ , AF $n = 11$ ) |              |                                  |              | Test Set ( $\Sigma n = 46$ , AF $n = 10$ ) |              |                                  |       |
|------------------|------------------------------------------------|--------------|----------------------------------|--------------|--------------------------------------------|--------------|----------------------------------|-------|
|                  | Univariate regression analysis                 |              | Multivariate regression analysis |              | Univariate regression analysis             |              | Multivariate regression analysis |       |
|                  | HR (CI 95%)                                    | P            | HR (CI 95%)                      | P            | HR (CI 95%)                                | P            | HR (CI 95%)                      | P     |
| s-ST2 (ng/ml)    | 1.09 (0.99–1.21)                               | <b>0.093</b> | 1.07 (0.05–1.21)                 | 0.277        | 1.06 (0.99–1.13)                           | 0.117        |                                  |       |
| Gal3 (ng/ml)     | 1.47 (0.88–2.45)                               | 0.141        |                                  |              | 1.30 (0.94–1.77)                           | 0.111        |                                  |       |
| miR-21           | 0.05 (0.003–0.782)                             | <b>0.033</b> | 0.02 (0.001–0.78)                | <b>0.036</b> | 0.16 (0.03–0.99)                           | <b>0.049</b> | 0.15 (0.02–1.12)                 | 0.064 |
| miR-29a          | 0.11 (0.01–0.92)                               | <b>0.042</b> | 0.83 (0.001–19119.53)            | 0.88         | 0.39 (0.074–2.10)                          | 0.271        |                                  |       |
| miR-133a         | 0.71 (0.15–3.37)                               | 0.666        |                                  |              | 0.40 (0.11–1.50)                           | 0.175        |                                  |       |
| miR-146b         | 0.11 (0.01–0.80)                               | <b>0.029</b> | 1.81 (0.001–5727.67)             | 0.886        | (0.39 (0.11–1.52)                          | 0.178        |                                  |       |
| miR-328          | 0.07 (0.006–0.88)                              | <b>0.039</b> | 5.2 (0.02–1433.12)               | 0.57         | 0.35 (0.07–1.65)                           | 0.185        |                                  |       |
| NT-proBNP (ng/L) | 1.002 (1.00–1.004)                             | <b>0.02</b>  | 1.002 (1.00–1.005)               | <b>0.042</b> | 1.003 (1.00–1.006)                         | <b>0.093</b> | 1.002 (1.00–1.004)               | 0.098 |

**Table S2. ROC-analysis of training and test set**

| Parameter        | Training Set ( $\Sigma n = 35$ , AF $n = 11$ ) |             | Test Set ( $\Sigma n = 47$ , AF $n = 10$ ) |             |
|------------------|------------------------------------------------|-------------|--------------------------------------------|-------------|
|                  | AUC                                            | 95% CI      | AUC                                        | 95% CI      |
| s-ST2 [ng/ml]    | 0.686                                          | 0.487–0.886 |                                            |             |
| Gal3 [ng/ml]     |                                                |             |                                            |             |
| miR-21           | 0.232                                          | 0.061–0.402 | 0.315                                      | 0.122–0.508 |
| miR-29a          | 0.264                                          | 0.069–0.458 |                                            |             |
| miR-133a         |                                                |             |                                            |             |
| miR-146b         | 0.282                                          | 0.082–0.482 |                                            |             |
| miR-328          | 0.264                                          | 0.080–0.448 |                                            |             |
| NT-proBNP [ng/L] | 0.773                                          | 0.596–0.949 | 0.732                                      | 0.564–0.901 |

**Table S3. Mc Nemar test for dependent samples**

| Biomarker         | Patients – AF<br>(n=60) |        |                 | Patients + AF<br>(n=21) |        |                 |
|-------------------|-------------------------|--------|-----------------|-------------------------|--------|-----------------|
|                   | NT-proBNP               | miR-21 | NT-proBNP+miR21 | NTproBNP                | miR-21 | NT-proBNP+miR21 |
| NT-proBNP         |                         | 0.122  | 0.016           |                         | <0.001 | 1.00            |
| miR-21            | 0.122                   |        | <0.001          | <0.001                  |        | 0.004           |
| NT-proBNP + miR21 | 0.016                   | <0.001 |                 | 1.00                    | 0.004  |                 |

**Table S4. Medication documented at study inclusion**

| <b>Parameter</b>      | <b>-AF<br/>(n = 60)</b> | <b>All patients<br/>+ AF<br/>(n = 21)</b> | <b>P<br/>-AF vs +AF</b> |
|-----------------------|-------------------------|-------------------------------------------|-------------------------|
| Vitamin K antagonists | 0                       | 0                                         |                         |
| NOAC                  | 2 (3.3%)                | 11 (52.4%)                                | <0.001                  |
| ASA                   | 28 (46.7%)              | 4 (19%)                                   | 0.026                   |
| Statine               | 24 (40%)                | 12 (57.1%)                                | 0.174                   |
| ACE-inhibitors        | 14 (23.3%)              | 11 (52.4%)                                | 0.013                   |
| ARB                   | 14 (23.3%)              | 5 (23.8%)                                 | 0.965                   |
| β-blockers            | 11 (18.3%)              | 15 (71.4%)                                | <0.001                  |
| MRA                   | 0                       | 0                                         |                         |

ACE-inhibitors- Angiotensin-converting-enzyme inhibitors, ARB- Angiotensin II receptor blockers, ASA- Acetylsalicylic acid, MRA- Mineralocorticoid receptor antagonist, NOAC- Non-vitamin K antagonist oral anticoagulants
